# Supplementary material
Source: MDPI journal article supplement (https://www.mdpi.com/2504-3129/4/4/25)

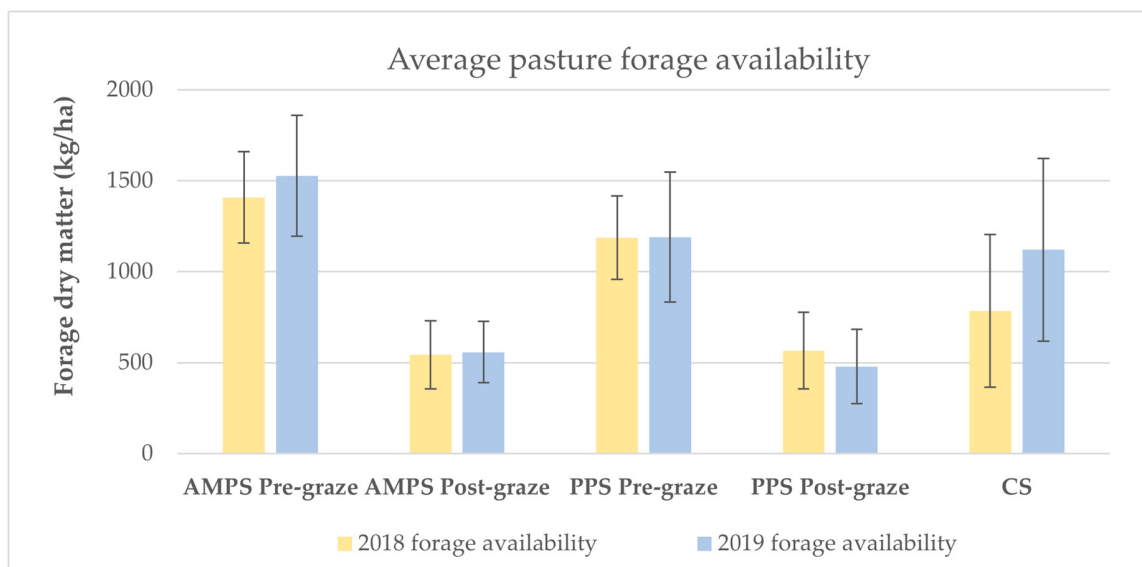

Figure S1. Average pasture forage yields for AMPS, PPS, and CS grazing systems for 2018 and 2019.

Supplement: s1 [file s1 › nitrogen-2667752-Supplementary.pdf]
